# Supplementary material
Source: PubMed Central journal article supplement (PMC4423545)

## Supplementary Online Content

Holtzheimer PE, Kelley ME, Gross RE, Filkowski MM, Garlow SJ, Barrocas A, Wint D, Craighead MC, Kozarsky J, Chismar R, Moreines JL, Mewes K, Riva Posse P, Gutman DA, Mayberg HS. Subcallosal cingulate deep brain stimulation for treatment-resistant unipolar and bipolar depression. *Arch Gen Psychiatry*. Published online January 2, 2012. doi:10.1001/archgenpsychiatry.2011.1456.

**eFigure.** Mean 17-item Hamilton Depression Rating Scale (HDRS) scores at 3-month intervals following onset of active stimulation for major depressive disorder (MDD) and bipolar II (BP) patients.

This supplementary material has been provided by the authors to give readers additional information about their work.

**eFigure.** Mean 17-item Hamilton Depression Rating Scale (HDRS) scores at 3-month intervals following onset of active stimulation for major depressive disorder (MDD) and bipolar II (BP) patients. Error bars represent standard error for the mean.

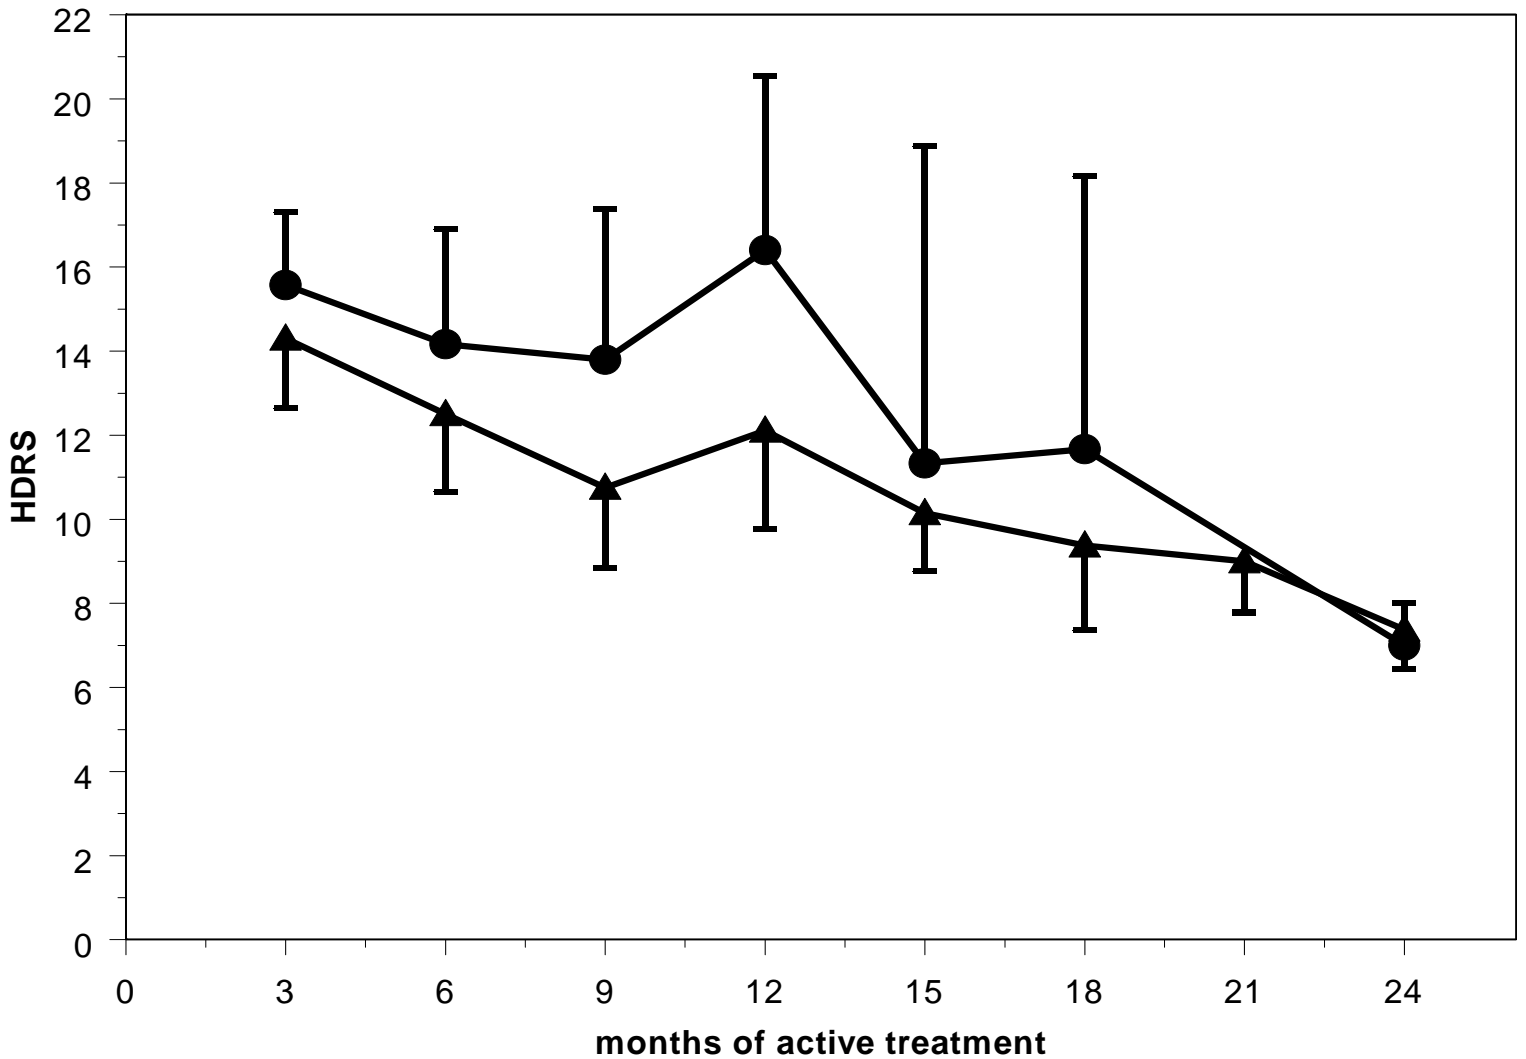

Supplement: NIHMS682023-supplement-Supplemental_Content.pdf [file NIHMS682023-supplement-Supplemental_Content.pdf]
